1 Routine Urinary Biochemistry Does Not Accurately Predict Stone Type Nor Recurrence in  
2 Kidney Stone Formers: A Multi-Centre, Multi-Model, Externally Validated Machine-Learning  
3 Study

4  
5 Robert M Geraghty, Ian Wilson, Eric Olinger, Paul Cook, Susan Troup, David Kennedy, Alistair  
6 Rogers, Bhaskar K Somani, Nasser A Dhayat, Daniel G Fuster, John A Sayer

7  
8 Mr Robert Geraghty - Corresponding Author

9 Academic Clinical Fellow in Urology

10 Department of Urology

11 Freeman Hospital

12 Newcastle-upon-Tyne

13 [Rob.geraghty@newcastle.ac.uk](mailto:Rob.geraghty@newcastle.ac.uk)

14

15 Dr Eric Olinger

16 Post-Doctoral Researcher

17 Translational and Clinical Institute, Faculty of Medical Sciences, Newcastle University,

18 Central Parkway, Newcastle upon Tyne, England, United Kingdom.

19

20 Dr Ian Wilson

21 Lecturer in Biomedical Statistics

22 Biosciences Institute

23 Newcastle University

24 International Centre for Life

25 Central Parkway

26 Newcastle-upon-Tyne

27

28 Dr Paul Cook

29 Consultant Chemical Pathologist

30 Department of Biochemistry

31 University Hospital Southampton

32 Southampton

33

34 Ms Susan Troup

35 Principal Clinical Biochemist

36 Department of Biochemistry

37 Queen Elizabeth Hospital

38 Gateshead

39

40 Dr David Kennedy

41 Consultant Clinical Biochemist

42 Department of Biochemistry

43 Queen Elizabeth Hospital

44 Gateshead

45

46 Mr Alistair Rogers

47 Consultant Urologist

48 Department of Urology  
49 Freeman Hospital  
50 Newcastle-upon-Tyne  
51  
52 Professor Bhaskar Somani  
53 Consultant Urologist and Professor of Urology  
54 Department of Urology  
55 University Hospital Southampton  
56 Southampton  
57  
58 Dr Nasser Dhayat  
59 Consultant Nephrologist  
60 Department of Nephrology and Hypertension, Inselspital, Bern University Hospital,  
61 University of Bern  
62 Switzerland  
63  
64 Professor Daniel Fuster  
65 Consultant Nephrologist and Associate Professor of Nephrology  
66 Department of Nephrology and Hypertension, Inselspital, Bern University Hospital,  
67 Department for Biomedical Research, University of Bern  
68 Switzerland  
69  
70 Professor John Sayer  
71 Professor of Nephrology and Honorary Consultant Renal Physician  
72 Translational and Clinical Institute, Faculty of Medical Sciences, Newcastle University,  
73 Central Parkway, Newcastle upon Tyne, England, United Kingdom.  
74 The Newcastle upon Tyne Hospitals NHS Foundation Trust, Freeman Road, Newcastle upon  
75 Tyne, England, United Kingdom.  
76 National Institute for Health Research Newcastle Biomedical Research Centre, Newcastle  
77 upon Tyne, England, United Kingdom.  
78  
79 **Keywords:** Kidney stones, Machine learning, Prediction, Urinary Biochemistry  
80  
81 **Word Count:**  
82 Abstract: 271/300  
83 Main body: 3574/4000  
84 References:  
85 Figures: 3  
86 Tables: 3  
87 Appendices: 3

88 Abstract

89 **Objectives:** Urinary biochemistry is used to detect and monitor conditions associated with  
90 recurrent kidney stones. There are no predictive machine learning (ML) tools for kidney  
91 stone type or recurrence. We therefore aimed to build and validate ML models for these  
92 outcomes using age, gender, 24-hour urine biochemistry and stone composition.

93 **Materials and Methods:** Data from 3 cohorts were used, Southampton, UK (n=3013),  
94 Newcastle, UK (n=5984) and Bern, Switzerland (n=794). Of these 3130 had available 24-hour  
95 urine biochemistry measurements (calcium, oxalate, urate, pH, volume), and 1684 had  
96 clinical data on kidney stone recurrence. Two predictive models were constructed (UK and  
97 Swiss) using two ML techniques (Partitioning and Random Forests [RF]) and validated  
98 internally with a subset of the same dataset (e.g UK model/UK test set), and externally with  
99 the other dataset (UK model/Swiss test set).

100 **Results and Limitations:** For kidney stone type, on external validation accuracy of UK RF  
101 model=0.79 (95% CI: 0.73-0.84), sensitivity: calcium oxalate=0.99 and calcium  
102 phosphate/urate=0.00. Specificity: calcium oxalate=0.00 and calcium  
103 phosphate/urate=0.99. For the Swiss RF model accuracy=0.87 (95% CI: 0.83-0.89),  
104 sensitivity: calcium oxalate=0.99 and calcium phosphate/urate=0.00. Specificity: calcium  
105 oxalate=0.00, calcium phosphate=0.00 and urate=1.00.

106 For stone recurrence, on external validation accuracy of UK RF model=0.22 (95% CI:  
107 0.19-0.25), sensitivity=0.93 and specificity=0.09. Swiss RF model accuracy=0.42 (95% CI:  
108 0.39-0.47), sensitivity=0.03 and specificity=0.97.

109 **Conclusions:** Neither kidney stone type nor kidney stone recurrence can be accurately  
110 predicted using modelling tools built using specific 24-hour urinary biochemistry values  
111 alone. Further studies to delineate accurate predictive tools should be undertaken using  
112 both known and novel risk factors.

## 113 Introduction

114 Kidney stones are prevalent<sup>1</sup>, costly<sup>2</sup> and debilitating, with a recurrence rate of  
115 around 40-50% at 10 years<sup>3</sup>. Although there are rare well described forms of kidney stones  
116 such as cystinuria leading to cystine stones, the pathophysiology underlying the most  
117 common types of kidney stones (calcium stones and urate) have not been satisfactorily  
118 described. Given the rising prevalence and cost of surgical treatment, tools are needed to  
119 accurately predict kidney stone type and more importantly, risk of recurrence so that  
120 preventative measures can be more focused and beneficial.

121 Kidney stone composition may not always be investigated, but remains vital for the  
122 identification of rarer stone types that require further management. There has previously  
123 been only one machine learning (ML) study that looked at prediction of kidney stone type<sup>4</sup>.  
124 Several types of ML models were constructed for kidney stone type prediction, achieving  
125 high accuracy (area under the curve (AUC)=0.99), although it was neither internally nor  
126 externally validated. They did not use urinary biochemistry, instead utilising demographics  
127 and basic medical history. Another study applied logistic regression to 24-hour urinary  
128 biochemistries to predict stone type, but this demonstrated poor predictive value<sup>5</sup>.  
129 Regression models are not as powerful as more modern ML techniques<sup>6</sup>.

130 The Recurrence of Kidney Stone (ROKS) nomogram was created to predict kidney  
131 stone recurrence and is largely based on non-biochemical risk factors and radiologic  
132 appearances, rather than biochemistry<sup>7</sup>. It had a moderate predictive value (AUC=0.65) for  
133 kidney stone recurrence at 2-years on external validation<sup>8</sup>. Until accuracy improves, this  
134 predictive model is not useful for influencing clinical practice.

135 Twenty four hour urine samples are often taken from high-risk stone formers<sup>9</sup> to  
136 identify stone forming risk factors such as hyperoxaluria, hypercalciuria, hyperuricosuria etc.  
137 Although the benefit of urinary biochemistry for managing kidney stone patients has not  
138 been fully established<sup>10</sup>, there is evidence from randomized controlled trials that  
139 medications used in specific, limited circumstances reduce the number and increase the  
140 time to, recurrence<sup>11</sup>. A systematic review by Hsi et al. delineates the limitations of 24-hour  
141 urine collection, none of the included studies demonstrate any predictive value for  
142 recurrence<sup>10</sup>.

143 To date there have been no predictive ML models for kidney stone type or  
144 recurrence based on 24-hour urinary biochemistry. We therefore aimed to construct  
145 predictive ML models for these outcomes using clinical and biochemical data from kidney  
146 stone patients to assess the predictive value of 24-hour urinary biochemistry.

## 147 Methods

### 148 *Data Collection across all Cohorts*

149 Age, sex, kidney stone recurrence, stone type and 24-hour urinary biochemistry  
150 (free-choice diet).

151 Urinary biochemistry obtained: calcium (mmol/24 hour), oxalate (mmol/24 hour),  
152 urate (mmol/24 hour), urine volume (L) and pH. Citrate (mmol/24 hour) was obtained from  
153 the Newcastle and Bern cohorts.

154 Stone type was ascertained using Fourier Transform IR spectroscopy in all cohorts.  
155 Differentiation between calcium oxalate types (monohydrate/dihydrate) was not available  
156 in the Southampton/Newcastle cohorts and therefore not included in analysis.  
157  
158  
159

160

161 Southampton, UK162 *Study Population*

163 The cohort consisted of patients with kidney stone disease presenting to University  
164 Hospital Southampton, UK (tertiary referral hospital) referred for metabolic assessment  
165 between 1990-2007. The initial cross-sectional study (n=2801)<sup>12</sup> and subsequent cohort  
166 subset<sup>2</sup> have been described. During this period, stone formers were routinely referred  
167 from across Hampshire, Isle of Wight and Dorset. The subset includes 1000 patients with  
168 further information ascertained retrospectively using hospital/general practice electronic  
169 records.

170 Patients who had no documentation (i.e no evidence of subsequent follow-  
171 up/consultation, lived outside/have left Hampshire or no documentation on CHIE) were  
172 excluded [see fig. 1].

173

174 *Ethical Approval*

175 Ethical approval for this arm of the study was granted by the NHS Bristol Research  
176 Ethics Committee (Rec ref: 18/SW/0185; IRAS ID: 240061).

177

178 Newcastle upon Tyne, UK179 *Study Population*

180 The cohort consisted of patients with kidney stone disease presenting to hospitals in  
181 the north of England between 2013 and 2018 [Appendix 1]. These include: The Newcastle  
182 upon Tyne Hospitals NHS Foundation Trust (Newcastle-upon-Tyne), James Cook University  
183 Hospital (Middlesbrough), Sunderland Royal Hospital, Durham University Hospital, Queen  
184 Elizabeth Hospital (Gateshead), Darlington Memorial Hospital, Cumberland Infirmary  
185 (Carlisle) and Northumbria Hospitals Trust (Wansbeck, Hexham, Cramlington).

186 Data ascertained retrospectively using electronic hospital records. Urinary biochemistry  
187 and stone type were obtained from the regional renal calculi processing unit (Queen Elizabeth  
188 Hospital, Gateshead).

189

190 *Ethical Approval*

191 This arm was registered as an audit (current patients of authors) with Newcastle-  
192 upon-Tyne Hospitals NHS Foundation Trust (audit number: 10337).

193

194 Bern, Switzerland195 *Study Population*

196 Patients enrolled in the Bern Kidney Stone Registry (BKSR) were referred to the  
197 Department of Nephrology and Hypertension, Inselspital, Bern University Hospital and  
198 included kidney stone formers suffering at least one stone episode. This population has  
199 previously been described in the literature<sup>13</sup>. Those <18 years were excluded.

200

201 *Ethical Approval*

202 The BKSR adheres to the Declaration of Helsinki, was approved by the Ethical  
203 Committee of the Kanton Bern (#95/06) and all patients provided written informed consent.

204

205 Definitions

206 Stone recurrence was defined as subsequent stone surgery or acute presentation  
207 following previous treatment/spontaneous passage. Presence of asymptomatic recurrence  
208 on imaging was not available.

209 Low urine volume was defined as <1.5L/24 hour. Acid urine was defined as pH <5.5.

210 Biochemical abnormalities were defined as follows, as per local laboratory values:  
211 hypercalciuria in women >6.2 mmol/24 hour and men >7.5 mmol/24 hour; hyperoxaluria in  
212 women >0.32 mmol/24 hour, men >0.49 mmol/24 hour; hyperuricosuria as >4.46 mmol/24  
213 hour and hypocitraturia as <0.6 mmol/24 hour.

214 Primary kidney stone type was defined as >50% of particular type.

215

### 216 Statistical Analysis

217 Analysis was performed in R (version no.4.0.2). For robustness, two machine learning  
218 models were used: Partitioning (rpart[19]) and Random Forests (randomForest[20] and  
219 missForest[21]) for both Stone Type and Recurrence. Missing data was accounted for with  
220 values imputed from existing data (missForest). Variables included in both analyses: age,  
221 sex, raw 24-hour urinary values (calcium, oxalate, urate, volume), pH and number of  
222 biochemical abnormalities. Urinary citrate was excluded due to low numbers with  
223 documented citrate. To investigate whether unbalanced data was driving discrimination, up-  
224 sampling of training data was used to create balanced training data sets using caret[22],  
225 which were run through subsequent analyses.

226 Recurrence rate was excluded in stone type models as this would be unknown at  
227 point of presentation. Stone type was included in the recurrence models. Those with  
228 unclear stone type were excluded from the Stone Type models. Data was partitioned into  
229 training (70% of total) and test (30%) datasets. Diagnostic accuracy statistics are presented  
230 in the results section. Sample sizes were not calculated as an effect size was not being  
231 calculated. For robustness, two models were used for each measure, and models were  
232 constructed from two cohorts. Sensitivity analysis is represented by the second model  
233 (random forests), and by the second dataset (Bern).

234

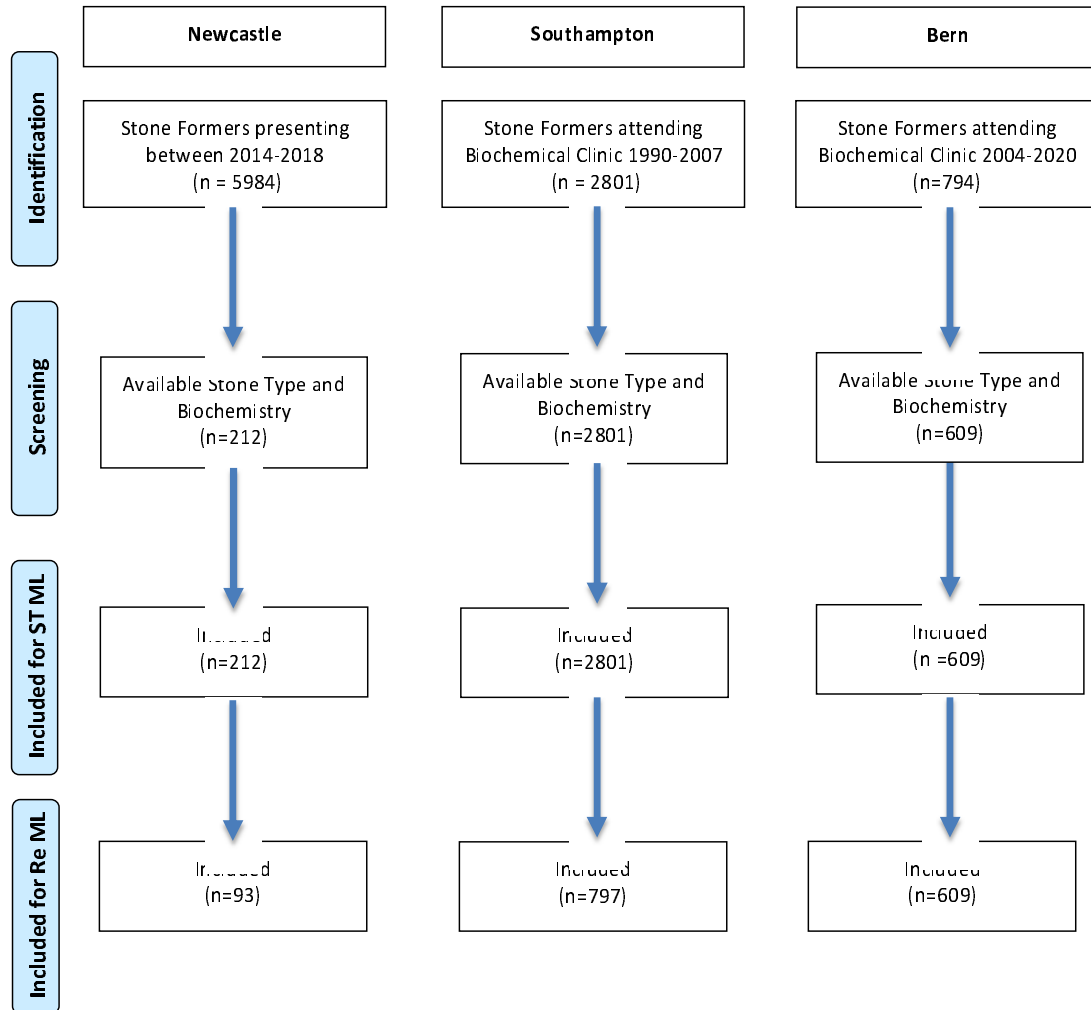

235

236

237

Figure 1. Flow diagram of patient selection/Inclusion. ML=Machine Learning, ST=Stone type, Re=Recurrence.

## 238 Results

239 Patient and Biochemistry Demographics

240 There were 3013 kidney stone patients in the Southampton/Newcastle combined  
 241 dataset [see table 1]. There were 2074 men (mean age  $49 \pm 15$  years) and 939 women (mean  
 242 age  $49 \pm 17$  years). Stone types were as follows: calcium oxalate ( $n=1476$ , 49%), calcium  
 243 phosphate ( $n=119$ , 4%), urate ( $n=89$ , 3%), cystine ( $n=5$ , 0.2%), struvite (magnesium  
 244 ammonium phosphate) ( $n=3$ , 0.1%) and no data ( $n=1321$ , 44%). Those with no data are  
 245 likely to have passed their stone/post treatment fragments (e.g. shockwave lithotripsy)  
 246 spontaneously. The stone was then not available for analysis. Of these 3013, 890 had  
 247 information on whether or not the patient had a kidney stone recurrence. Of these, 374 had  
 248 a recurrence (39%). The low numbers of patients with follow-up information are likely due  
 249 to the patient not accessing medical services following the initial stone episode, moving  
 250 away or dying.

251 There were 794 kidney stone patients in the Bern dataset, with 204 women (mean  
 252 age  $45 \pm 15$  years) and 590 men (mean age  $48 \pm 13$  years). Stone types were as follows:  
 253 calcium oxalate ( $n=598$ , 76%), calcium phosphate ( $n=81$ , 10%), urate ( $n=47$ , 6%), cystine  
 254 ( $n=16$ , 2%), struvite ( $n=6$ , 0.8%) and no data ( $n=40$ , 5.1%) [see fig 2]. All had follow-up data  
 255 available for stone recurrence. There were 676 recurrences (85%).

256 Across all 3 datasets, 3130 patients had full data on urinary biochemistry. There  
 257 were 631 (20.1%) patients who had no biochemical diagnoses, 1331 (42.5%) patients with a  
 258 single diagnosis and 1668 (37.3%) with a combination of biochemical abnormalities.

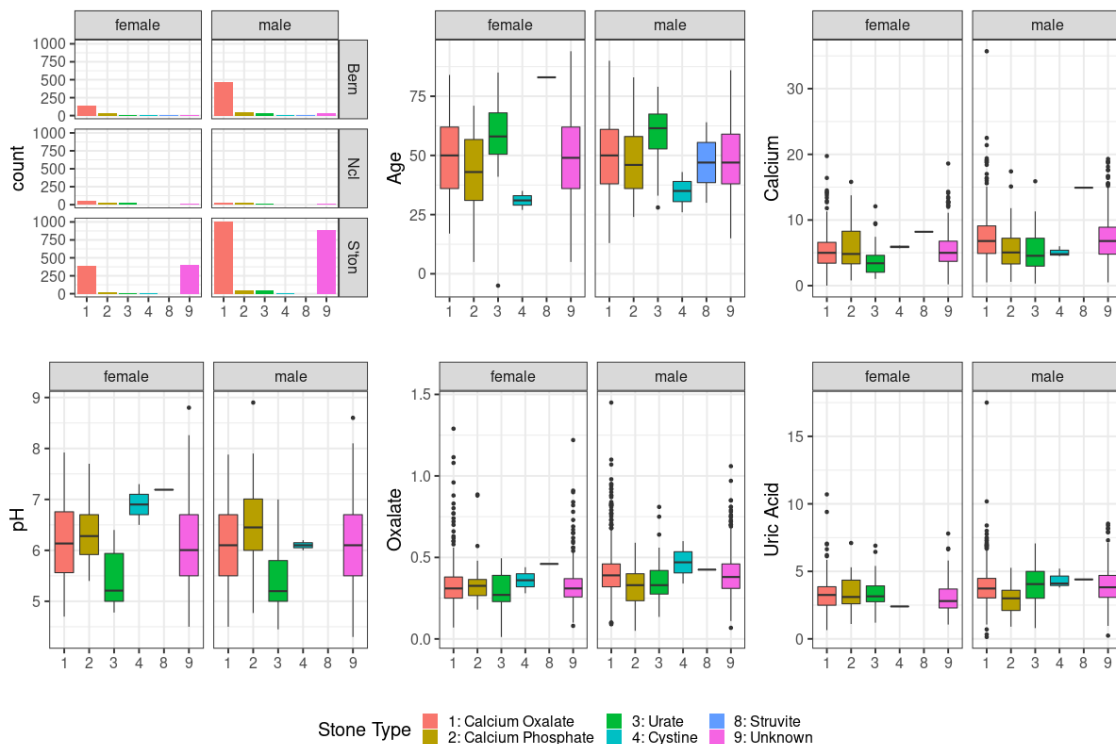

259 *Figure 2. Graphical representation of differences between cohorts and sexes. On top row,*  
 260 *from left to right: bar chart of number of patients in each sex, in each cohort by stone type;*  
 261 *boxplot of age for each sex per stone type; boxplot of 24-hour urinary calcium (mmol/24*  
 262 *hour) for each sex per stone type. Bottom row, from left to right: boxplot of urinary pH for*  
 263 *each sex per stone type; boxplot of 24-hour urinary oxalate (mmol/24 hour) for each sex per*  
 264 *stone type; boxplot of 24 hour urinary uric acid (mmol/24 hour) for each sex per stone type.*  
 265



266 Of those with full data on urinary biochemistry, 1002 patients had data on kidney  
 267 stone recurrence. In total 688 (68.7%) had a recurrence. There were 272 (74.7%)  
 268 recurrences in those with no biochemical diagnosis, 258 (67.0%) with a single biochemical  
 269 risk factor and 163 (64.4%) in those with a combination [see appendices 2 & 3].

270 The Southampton dataset did not contain 24-hour urinary citrate measurements. In  
 271 the Newcastle & Bern datasets there were 45 and 121 patients, respectively, with  
 272 hypocitraturia. Recurrence data was available in 144 patients, with recurrence in 11/23  
 273 (Newcastle, 47.8%) and 109/121 (Bern, 90.0%), respectively.

274 Discordant primary kidney stone type and 24-hour urine biochemistry was seen in  
 275 103 patients (5% of known stone type). Cystine stones (n=21) and struvite stones (n=9) were  
 276 not included in the appendices given their low numbers and alternative aetiologies.

277 Data on subsequent primary stone type was available in the Bern dataset for a  
 278 subset of those with a stone recurrence (n=188). Change in primary stone type from initial  
 279 episode was seen in 42 patients (22%): calcium oxalate (n=26, 18%), calcium phosphate  
 280 (n=10, 37%), urate (n=5, 38%), cystine (n=0, 0%), struvite (n=1, 100%) [Figure 3].

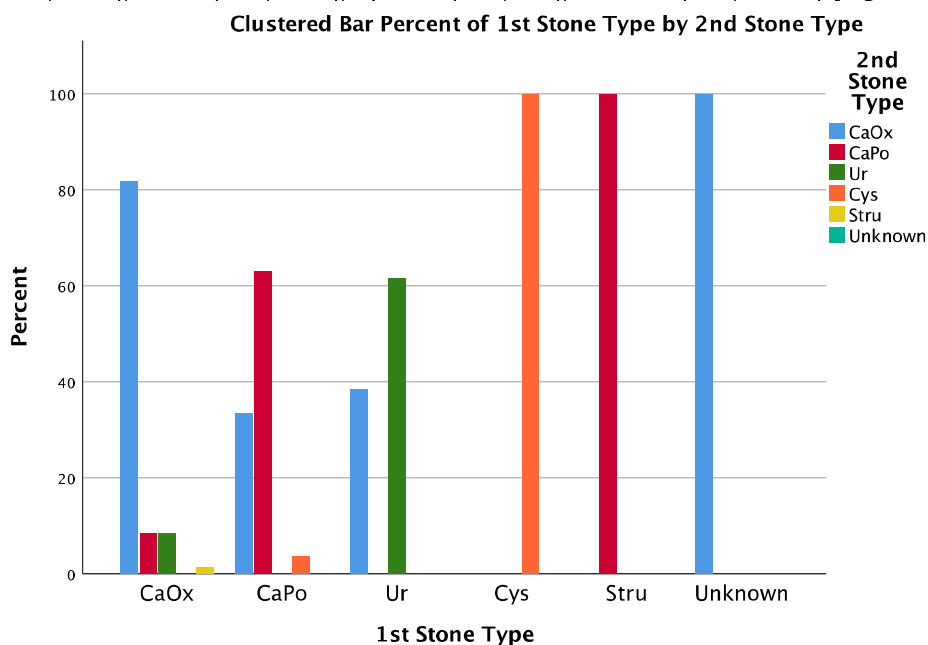

281  
 282 *Figure 3. Bar chart showing percentage of subsequent stone type for each first stone type,*  
 283 *data from the Bern Cohort. CaOx=Calcium Oxalate, CaPo=Calcium Phosphate, Ur=Urate,*  
 284 *Cys=Cystine, Stru=Struvite*

285

|                                          |                                 | Southampton   | Newcastle    | Combined<br>Southampton &<br>Newcastle | Bern            |
|------------------------------------------|---------------------------------|---------------|--------------|----------------------------------------|-----------------|
| <b>Total, n</b>                          |                                 | 2801          | 212          | 3013                                   | 794             |
| <b>Sex</b>                               | <b>Female, n</b>                | 818 (29%)     | 91 (43%)     | 939 (31%)                              | 204 (26%)       |
|                                          | <b>Female, Age±SD</b>           | 49±16         | 50±19        | 49±17                                  | 45±15           |
|                                          | <b>Male, n</b>                  | 1984 (71%)    | 121 (57%)    | 2073 (69%)                             | 590 (74%)       |
|                                          | <b>Male, Age±SD</b>             | 49±14         | 48±16        | 49±15                                  | 48±13           |
| <b>Stone Type</b>                        | <b>Calcium Oxalate, n (%)</b>   | 1393 (50%)    | 83 (39%)     | 1476 (49%)                             | 598 (75.9%)     |
|                                          | <b>Calcium Phosphate, n (%)</b> | 59 (2%)       | 60 (28%)     | 119 (4.0%)                             | 81 (10.3%)      |
|                                          | <b>Urate, n (%)</b>             | 55 (2%)       | 34 (16%)     | 89 (3.0%)                              | 47 (6.0%)       |
|                                          | <b>Cystine, n (%)</b>           | 5 (0.2%)      | 0            | 5 (0.2%)                               | 16 (2.0%)       |
|                                          | <b>Struvite, n (%)</b>          | 1 (0.04%)     | 2 (1%)       | 3 (0.1%)                               | 6 (0.8%)        |
|                                          | <b>No data, n (%)</b>           | 1288 (46%)    | 33 (16%)     | 1321 (44%)                             | 40 (5.1%)       |
| <b>Recurrence, n/total with data (%)</b> |                                 | 325/855 (38%) | 49/111 (44%) | 374/890 (39%)                          | 676/794 (85.1%) |

286 *Table 1. Patient and Kidney Stone Demographics. Age in years.*287 Machine Learning Models:288 Stone Type

289 The training group had n=3092 patients, n=2360 of which had immediate clearance on  
290 fluoroscopy. On internal validation (test set: n with outcome/total; n=1015/1326), the  
291 diagnostic accuracy statistics were: Random forests (RF) AUC=0.73, accuracy= 0.77 (95%  
292 CI:0.74-0.79), sensitivity=0.27, specificity=0.94; Partitioning AUC=0.63, accuracy=0.71(95%  
293 CI:0.69-0.74), sensitivity=0.22, specificity=0.89; Extreme Gradient Boosting (XGBoost)  
294 AUC=0.75, accuracy=0.77 (95% CI:0.75-0.80), sensitivity=0.27, specificity=0.94; Logistic  
295 Regression (LR) AUC=0.63, accuracy=0.76 (95% CI:0.73-0.78), sensitivity=0.12,  
296 specificity=0.97; Classical Neural Network (NN) AUC=0.74, accuracy=0.75 (95% CI:0.73-0.78),  
297 sensitivity=0.23, specificity=0.94; Bayesian Generalised Linear Model (BGLM)  
298 AUC=0.75, accuracy=0.77 (95% CI:0.75-0.80), sensitivity=0.29, specificity=0.94; Deep Neural  
299 Network (DNN) Single-outcome model AUC=0.59, accuracy=0.77 (95% CI:0.75-0.79),  
300 sensitivity=0.57, specificity=0.79; DNN Multiple-outcome model AUC=0.53,  
301 accuracy=0.77 (95% CI:0.75-0.79), sensitivity=0.60, specificity=0.78 [see figure 2  
302 and supplementary table 2].

303

304

305

306

307

308

309

310

311

312

313

314

315

316

317

318

319

320

321

322

323

324

325

326

327

328

Two models were built to predict kidney stone type, partitioning and Random Forests (RF). Both models used all available 24 hour urinary biochemical data (volume, calcium, oxalate, urate and pH), age and sex. Citrate was excluded as the Southampton data did not have this. Due to missing values (as detailed above), some biochemical values were imputed. Up-sampling of rare stone data, while marginally improving classification into rare stone types, overall gave inferior classification, therefore simple training sets are reported.

For the internally validated Southampton/Newcastle models, the partitioning model accuracy was 0.89 (95% CI: 0.85-0.91) and RF model accuracy was 0.90 (95% CI: 0.87-0.92) [see table 3].

For the internally validated Bern models, the partitioning model accuracy was 0.75 (95% CI: 0.69-0.81) and RF model was 0.81 (95% CI: 0.78-0.84).

None of the models were able to predict cystine/struvite stones.

Each RF model was externally validated using the other dataset. For the Southampton/Newcastle model, validated with Bern data, the accuracy was 0.79 (95% CI: 0.73-0.84). The sensitivity for: calcium oxalate=0.99, calcium phosphate/urate=0.00. The specificity for: calcium oxalate=0.00 and calcium phosphate/urate=0.99.

For the Bern model, validated with Southampton/Newcastle data, the accuracy was 0.87 (95% CI: 0.83-0.89). The sensitivity for: calcium oxalate=0.99, calcium phosphate=0.00 and urate=0.04. The specificity for: calcium oxalate=0.02, calcium phosphate=0.99 and urate=1.00.

Addition of citrate into the models with the Newcastle and Bern datasets did not demonstrate any difference in accuracy, sensitivity or specificity for stone type. Increasing the predominant stone type threshold for calcium phosphate stones to 90% did not increase accuracy, sensitivity or specificity.

329 Recurrence

330 Two models were used to predict recurrence (Partitioning and RF). Both models used  
 331 all biochemistry previously described, age and sex. Biochemical value imputation as above.

332 For the internally validated Southampton/Newcastle models, the partitioning model  
 333 accuracy was 0.52 (95% CI: 0.45-0.60), correctly predicting 25/72 recurrences and 70/109  
 334 without. The RF model accuracy was 0.55 (95% CI: 0.48-0.63), correctly predicting 25/72  
 335 recurrences and 75/109 without [see Table 4].

336 For the internally validated Bern models, the partitioning model accuracy was 0.85  
 337 (95% CI: 0.80-0.89), correctly predicting 201/212 recurrences, and 2/27 without. The RF  
 338 model accuracy was 0.89 (95% CI: 0.84-0.93), correctly predicting 163/165 recurrences, and  
 339 1/19 without.

| Recurrence               | Southampton/Newcastle Model |                  | Bern Model       |                  |
|--------------------------|-----------------------------|------------------|------------------|------------------|
|                          | Partitioning                | Random Forests   | Partitioning     | Random Forests   |
| <b>Accuracy (95% CI)</b> | 0.52 (0.45-0.60)            | 0.55 (0.48-0.63) | 0.85 (0.80-0.89) | 0.89 (0.84-0.93) |
| <b>Sensitivity</b>       | 0.64                        | 0.69             | 0.07             | 0.05             |
| <b>Specificity</b>       | 0.35                        | 0.35             | 0.95             | 0.99             |
| <b>PPV</b>               | 0.60                        | 0.61             | 0.15             | 0.33             |
| <b>NPV</b>               | 0.40                        | 0.42             | 0.89             | 0.90             |
| <b>Detection Rate</b>    | 0.39                        | 0.41             | 0.008            | 0.005            |

340 *Table 2. Descriptive statistics for Partitioning and Random Forests models predicting*  
 341 *recurrence. PPV=positive predictive value, NPV=negative predictive value. Test set=30% of*  
 342 *same cohort*

343 Each RF model was externally validated as above. The Southampton/Newcastle  
 344 model, validated with Bern data, accuracy was 0.22 (95% CI: 0.19-0.25), sensitivity=0.93,  
 345 specificity=0.09, correctly predicting 55/632 recurrences and 108/116 without.

346 The Bern model, validated with Southampton/Newcastle data, accuracy was 0.42  
 347 (95% CI: 0.39-0.47), sensitivity=0.03, specificity=0.97, correctly predicting 235/242  
 348 recurrences and 11/332 without.

349 **Addition of citrate into the models with the Newcastle and Bern datasets did not**  
 350 **demonstrate any difference in accuracy, sensitivity or specificity for stone type. Increasing**  
 351 **the predominant stone type threshold for calcium phosphate stones to 90% did not increase**  
 352 **accuracy, sensitivity or specificity.**

353

354 Discussion

355 This study utilised 24-hour urinary biochemistry data from kidney stone patients  
 356 attending three European tertiary referral centres to make two cohorts  
 357 (Southampton/Newcastle and Bern), used to construct internally validated machine learning  
 358 (ML) models for both kidney stone type and kidney stone recurrence. These models were  
 359 then externally validated on the other cohort. The recurrence models had very poor  
 360 accuracy, whilst the kidney stone type models demonstrated high overall accuracy. However  
 361 this is likely due to the high number of calcium oxalate kidney stones in our datasets

362 (reflected in the literature [23]), the diagnostic statistics demonstrate very poor predictive  
363 value for other stone types. In essence the models predict every stone as calcium oxalate.

364 The poor predictive value for both outcomes are important negative findings. The  
365 composition of most kidney stones is unknown (36% in this study and  $\leq 85\%$  in the  
366 literature[24]), and 24-hour urine collection is used to identify recurrent/high-risk stone  
367 formers who could be started on prophylaxis [11,12].

368 The main strengths of this study are the large cohort sizes, internal & external  
369 validation[19,20], multiple ML models (superior to regression analyses[8]) showing similar  
370 outcomes and consistent outcomes across both datasets.

371 There are several weaknesses with this study. Few of the Newcastle kidney stone  
372 patient cohort had 24-hour urinary biochemical analysis available, and fewer (in both  
373 datasets) had data on recurrence. This was addressed with imputation of missing data[21].  
374 Unfortunately, 24-hour urinary citrate was not available in the Southampton dataset, which  
375 may bias our main results as hypocitraturia is an important risk factor for calcium-containing  
376 kidney stones[25]. To investigate this both models were repeated with citrate included for  
377 the Bern/Newcastle datasets, this did not demonstrate any improvement in diagnostic  
378 statistics. The datasets did not include 24-hour urinary phosphate or sodium, both of which  
379 influence the risk of stone formation[26]. Therefore, predictive value may be improved with  
380 the addition of these variables. The stone type models could not predict struvite or cystine  
381 stones. This is likely due to minimal numbers of these stones, thus underpowering the  
382 model, and their alternative pathophysiology[27,28]. Although it is accepted that those with  
383 cystinuria, are at high risk of recurrence[28].

384 The datasets differ in terms of stone types proportions, notably uric acid and calcium  
385 phosphate stones. For instance, in the Southampton and Bern cohorts uric acid stones  
386 represent 3.6% and 6% respectively, whilst in the Newcastle dataset 19% have these (10% of  
387 total 5984 patients). Uric acid stones are associated with obesity/metabolic syndrome[29],  
388 and this observation may represent rising levels in Newcastle compared to an historic  
389 population (Southampton), or a contemporary European population (Bern). This could also  
390 represent referral bias, e.g. in the Bern cohort referral rates for urate stones were  
391 historically lower than present. As information on BMI or diabetes mellitus was not available  
392 this limits the predictive value of the models to predict stone type.

393 Proportions of calcium phosphate stones are also different between datasets (2% in  
394 Southampton, whilst 28% in Newcastle). This may be due to selection bias, as large numbers  
395 of patients in the Newcastle set did not have urinary biochemistry available. This may also  
396 be due to our definition of predominant stone type (i.e  $>50\%$ ). Pure calcium phosphate  
397 stones ( $>90\%$ ) are associated with a specific phenotype (alkaline urine and hypocitraturia)  
398 [30]. Increasing the cut-off for calcium phosphate stones to  $>90\%$  did not demonstrate an  
399 increase in predictive power for either stone type or recurrence. This may be due to the low  
400 numbers with this stone type (UK: from 4% to 2.8%, Bern: 10.3% to 2.6%). This touches on  
401 the wider issue of stone type interpretation. There are no guidelines on how to interpret  
402 stone composition, nor are there consistent methods within the literature. It is well known  
403 that stones can take many forms/compositions, but translation of these observations has  
404 yet to reach everyday practice. Our use of a  $>50\%$  cut-off was an attempt to use standard  
405 laboratory outputs to improve model accessibility.

406 As well as differences in stone type, recurrence data also differed between datasets,  
407 Bern had a far higher rate than the UK cohorts (which are similar to the literature[5]). This is  
408 likely due to the selection of patients going to biochemical clinic/tertiary care and will likely

409 skew the results as these patients are not representative of the general stone forming  
410 population. This is reflected in the recurrence models, the Bern model predict most as  
411 recurrence, whilst the Southampton/Newcastle model predict most as no recurrence.

412 24-hour urinary biochemistry is touted as a good measure to identify urinary risk  
413 factors for stone formation[11,12]. In certain circumstances this is true[15], however there  
414 are a significant minority of recurrent kidney stone formers who have no biochemical  
415 abnormalities (20% in these cohorts and similar to rates seen in other studies[14,31]). This  
416 may be due to dietary influence on urinary biochemistry, with a random diet unpredictably  
417 influencing the results[32]. Further, a small proportion of patients have discordant urinary  
418 biochemistry and stone type (3.3% across these cohorts), which makes prediction of  
419 unknown stone type unreliable. In summary, the main challenge to model accuracy was not  
420 unbalanced data but a lack of factors that could provide effective discrimination.

421 There is a growing body of evidence that kidney stone disease is the common end  
422 point of a heterogenous group of disorders that include environmental[33], dietary[34,35],  
423 monogenic[36] and polygenic risk factors[37,38], whether in isolation or combination.  
424 Therefore reliance on urinary biochemistry alone as a predictive tool, as this study  
425 demonstrates, is inadvisable. This study, along with a recent study demonstrating the futility  
426 of serum biochemistry (except calcium)[39], demonstrate that current practices[11,12] to  
427 delineate risk of kidney stone recurrence do not work well. At least 15% of kidney stones  
428 have a monogenic cause[36], with a significant proportion forming calcium stones[40]. It is  
429 evident that a precision medicine approach is needed to differentiate the differing causes of  
430 KSD, which may then be treated effectively[41].

431 Future studies are needed to delineate an effective kidney stone screen based on  
432 traditional risk factors in combination with kidney stone analysis, 24-hour urinary  
433 biochemistry, monogenic screen and polygenic risk scoring.

#### 434 Conclusion

435 Neither kidney stone type nor kidney stone recurrence can be accurately predicted  
436 by 24-hour urinary biochemistry. Further studies to delineate an effective stone screen  
437 should be undertaken.

438

#### 439 Acknowledgements

440 Robert Geraghty is a National Institute for Health Research Academic Clinical Fellow.  
441 Eric Olinger is supported by an Early Postdoc Mobility Stipendium of the Swiss National  
442 Science Foundation and Kidney Research UK. John Sayer is funded by Kidney Research UK  
443 and the Northern Counties Kidney Research Fund.

444 We would like to acknowledge Dr Valerie Walker for initiating the Southampton  
445 stone database.

446

#### 447 References

- 448 [1] Antonelli JA, Maalouf NM, Pearle MS, Lotan Y. Use of the National Health and  
449 Nutrition Examination Survey to Calculate the Impact of Obesity and Diabetes on  
450 Cost and Prevalence of Urolithiasis in 2030. *European Urology* 2014;66:724–9.  
451 doi:10.1016/j.eururo.2014.06.036.

- 452 [2] Geraghty RM, Cook P, Walker V, Somani BK. Evaluation of the economic burden of  
453 kidney stone disease in the UK: a retrospective cohort study with a mean follow-up  
454 of 19 years. *BJU Int* 2020;125:586–94. doi:10.1111/bju.14991.
- 455 [3] Lien C-S, Huang C-P, Chung C-J, Lin C-L, Chang C-H. Increased risk of anxiety among  
456 patients with urolithiasis: A nationwide population-based cohort study. *Int J Urol*  
457 2015;22:937–42. doi:10.1111/iju.12865.
- 458 [4] Canales BK, Sharma N, Yuzhakov SV, Bozorgmehri S, Otto BJ, Bird VG. Long-term  
459 Recurrence Rates in Uric Acid Stone Formers With or Without Medical  
460 Management. *Urology* 2019;131:46–52. doi:10.1016/j.urology.2019.05.023.
- 461 [5] Ljunghall S, Danielson BG. A Prospective Study of Renal Stone Recurrences. *British*  
462 *Journal of Urology* 1984;56:122–4. doi:10.1111/j.1464-410X.1984.tb05346.x.
- 463 [6] Kazemi Y, Mirroshandel SA. A novel method for predicting kidney stone type using  
464 ensemble learning. *Artif Intell Med* 2018;84:117–26.  
465 doi:10.1016/j.artmed.2017.12.001.
- 466 [7] Moreira DM, Friedlander JI, Hartman C, Elsamra SE, Smith AD, Okeke Z. Using 24-  
467 hour urinalysis to predict stone type. *J Urol* 2013;190:2106–11.  
468 doi:10.1016/j.juro.2013.05.115.
- 469 [8] Boulesteix AL, Schmid M. Machine learning versus statistical modeling. *Biometrical*  
470 *Journal* 2014;56:588–93. doi:10.1002/bimj.201300226.
- 471 [9] Rule AD, Lieske JC, Li X, Melton LJ, Krambeck AE, Bergstralh EJ. The ROKS nomogram  
472 for predicting a second symptomatic stone episode. *J Am Soc Nephrol*  
473 2014;25:2878–86. doi:10.1681/ASN.2013091011.
- 474 [10] Iremashvili V, Li S, Penniston KL, Best SL, Hedican SP, Nakada SY. External Validation  
475 of the Recurrence of Kidney Stone Nomogram in a Surgical Cohort. *J Endourol*  
476 2019;33:475–9. doi:10.1089/end.2018.0893.
- 477 [11] Türk C, Petřík A, Sarica K, Seitz C, Skolarikos A, Straub M, et al. EAU Guidelines on  
478 Interventional Treatment for Urolithiasis. *European Urology* 2016;69:475–82.  
479 doi:10.1016/j.eururo.2015.07.041.
- 480 [12] Pearle MS, Goldfarb DS, Assimos DG, Curhan G, Denu-Ciocca CJ, Matlaga BR, et al.  
481 AUA Guidelines Medical Management of Kidney Stones: AUA Guideline. *Juro*  
482 2014;192:316–24. doi:10.1016/j.juro.2014.05.006.
- 483 [13] Eisner BH, Goldfarb DS. A Nomogram for the Prediction of Kidney Stone Recurrence.  
484 *Journal of the American Society of Nephrology* 2014:1–3.  
485 doi:10.1681/ASN.2013.111180.
- 486 [14] Hsi RS, Sanford T, Goldfarb DS, Stoller ML. The Role of the 24-Hour Urine Collection  
487 in the Prevention of Kidney Stone Recurrence. *J Urol* 2017;197:1084–9.  
488 doi:10.1016/j.juro.2016.10.052.
- 489 [15] Fink HA, Wilt TJ, Eidman KE, Garimella PS, MacDonald R, Rutks IR, et al. Medical  
490 management to prevent recurrent nephrolithiasis in adults: a systematic review for  
491 an American College of Physicians Clinical Guideline. *Ann Intern Med* 2013;158:535–  
492 43. doi:10.7326/0003-4819-158-7-201304020-00005.
- 493 [16] Walker V, Stansbridge EM, Griffin DG. Demography and biochemistry of 2800  
494 patients from a renal stones clinic. *Annals of Clinical Biochemistry* 2013;50:127–39.  
495 doi:10.1258/acb.2012.012122.
- 496 [17] Dhayat NA, Lüthi D, Schneider L, Mattmann C, Vogt B, Fuster DG. Distinct  
497 phenotype of kidney stone formers with renal phosphate leak. *Nephrol Dial*  
498 *Transplant* 2019;34:129–37. doi:10.1093/ndt/gfy170.

- 499 [18] Dhayat NA, Schaller A, Albano G, Poindexter J, Griffith C, Pasch A, et al. The  
500 Vacuolar H<sup>+</sup>-ATPase B1 Subunit Polymorphism p.E161K Associates with Impaired  
501 Urinary Acidification in Recurrent Stone Formers. *J Am Soc Nephrol* 2016;27:1544–  
502 54. doi:10.1681/ASN.2015040367.
- 503 [19] Therneau TM, Atkinson B, Ripley MB. The rpart package 2010.
- 504 [20] Segal MR. Machine Learning Benchmarks and Random Forest Regression 2004.
- 505 [21] Stekhoven DJ. missForest: Nonparametric missing value imputation using random  
506 forest. *Astrophysics Source Code Library* n.d.:ascl:1505.011.
- 507 [22] Kuhn M. caret: Classification and Regression Training. *Astrophysics Source Code*  
508 *Library* n.d.:ascl:1505.003.
- 509 [23] Daudon M, Lacour B, Jungers P. Influence of body size on urinary stone composition  
510 in men and women. *Urological Research* 2006;34:193–9. doi:10.1007/s00240-006-  
511 0042-8.
- 512 [24] Yasui T, Iguchi M, Suzuki S, Kohri K. Prevalence and Epidemiological Characteristics  
513 of Urolithiasis in Japan: National Trends Between 1965 and 2005. *Urology*  
514 2008;71:209–13. doi:10.1016/j.urology.2007.09.034.
- 515 [25] Eisner BH, Sheth S, Dretler SP, Herrick B, Pais VM. Abnormalities of 24-hour urine  
516 composition in first-time and recurrent stone-formers. *Urology* 2012;80:776–9.  
517 doi:10.1016/j.urology.2012.06.034.
- 518 [26] Curhan GC, Taylor EN. 24-h uric acid excretion and the risk of kidney stones. *Kidney*  
519 *International* 2008;73:489–96. doi:10.1038/sj.ki.5002708.
- 520 [27] Flannigan R, Choy WH, Chew B, Lange D. Renal struvite stones--pathogenesis,  
521 microbiology, and management strategies. *Nat Rev Urol* 2014;11:333–41.  
522 doi:10.1038/nrurol.2014.99.
- 523 [28] Chillarón J, Font-Llitjós M, Fort J, Zorzano A, Goldfarb DS, Nunes V, et al.  
524 Pathophysiology and treatment of cystinuria. *Nat Rev Nephrol* 2010;6:424–34.  
525 doi:10.1038/nrneph.2010.69.
- 526 [29] Geraghty R, Abdi A, Somani B, Cook P, Roderick P. Does chronic hyperglycaemia  
527 increase the risk of kidney stone disease? results from a systematic review and  
528 meta-analysis. *BMJ Open* 2020;10:e032094. doi:10.1136/bmjopen-2019-032094.
- 529 [30] Grases F, Costa-Bauzá A, Ramis M, Montesinos V, Conte A. Simple classification of  
530 renal calculi closely related to their micromorphology and etiology. *Clin Chim Acta*  
531 2002;322:29–36. doi:10.1016/s0009-8981(02)00063-3.
- 532 [31] Gentle DL, Stoller ML, Bruce JE, Leslie SW. Geriatric urolithiasis. *Juro*  
533 1997;158:2221–4. doi:10.1016/s0022-5347(01)68203-x.
- 534 [32] Fuster DG, Morard GA, Schneider L, Mattmann C, Lüthi D, Vogt B, et al. Association  
535 of urinary sex steroid hormones with urinary calcium, oxalate and citrate excretion  
536 in kidney stone formers. *Nephrol Dial Transplant* 2020. doi:10.1093/ndt/gfaa360.
- 537 [33] Yamout H, Goldberg S. Genetic and Environmental Risk Factors for Kidney Stones.  
538 *Nutritional and Medical Management of Kidney Stones*, vol. 62, Cham: Humana,  
539 Cham; 2019, pp. 43–52. doi:10.1007/978-3-030-15534-6\_3.
- 540 [34] Hiatt RA, Ettinger B, Caan B, Quesenberry CP, Duncan D, Citron JT. Randomized  
541 controlled trial of a low animal protein, high fiber diet in the prevention of recurrent  
542 calcium oxalate kidney stones. *Am J Epidemiol* 1996;144:25–33.
- 543 [35] Fink HA, Akornor JW, Garimella PS, MacDonald R, Cutting A, Rutks IR, et al. Diet,  
544 fluid, or supplements for secondary prevention of nephrolithiasis: a systematic



- 545 review and meta-analysis of randomized trials. *European Urology* 2009;56:72–80.  
546 doi:10.1016/j.eururo.2009.03.031.
- 547 [36] Halbritter J, Baum M, Hynes AM, Rice SJ, Thwaites DT, Gucev ZS, et al. Fourteen  
548 monogenic genes account for 15% of nephrolithiasis/nephrocalcinosis. *J Am Soc*  
549 *Nephrol* 2015;26:543–51. doi:10.1681/ASN.2014040388.
- 550 [37] Paranjpe I, Tsao N, Judy R, Paranjpe M, Chaudhary K, Klein D, et al. Derivation and  
551 Validation of Genome Wide Polygenic Score for Urinary Tract Stone Diagnosis.  
552 *Kidney International* 2020. doi:10.1016/j.kint.2020.04.055.
- 553 [38] Howles SA, Wiberg A, Goldsworthy M, Bayliss AL, Gluck AK, Ng M, et al. Genetic  
554 variants of calcium and vitamin D metabolism in kidney stone disease. *Nat Commun*  
555 2019;10:5175–10. doi:10.1038/s41467-019-13145-x.
- 556 [39] Eyre KS, Lewis F, Cui H, Grout E, Mihai R, Turney BW, et al. Utility of blood tests in  
557 screening for metabolic disorders in kidney stone disease. *BJU Int* 2020.  
558 doi:10.1111/bju.15250.
- 559 [40] Hill F, Sayer JA. Precision medicine in renal stone-formers. *Urolithiasis* 2019;47:99–  
560 105. doi:10.1007/s00240-018-1091-5.
- 561 [41] Sayer JA, Moochhala SH, Thomas DJ. The Medical Management of Urolithiasis:.  
562 *British Journal of Medical and Surgical Urology* 2010;3:87–95.  
563 doi:10.1016/j.bjmsu.2010.02.004.

564

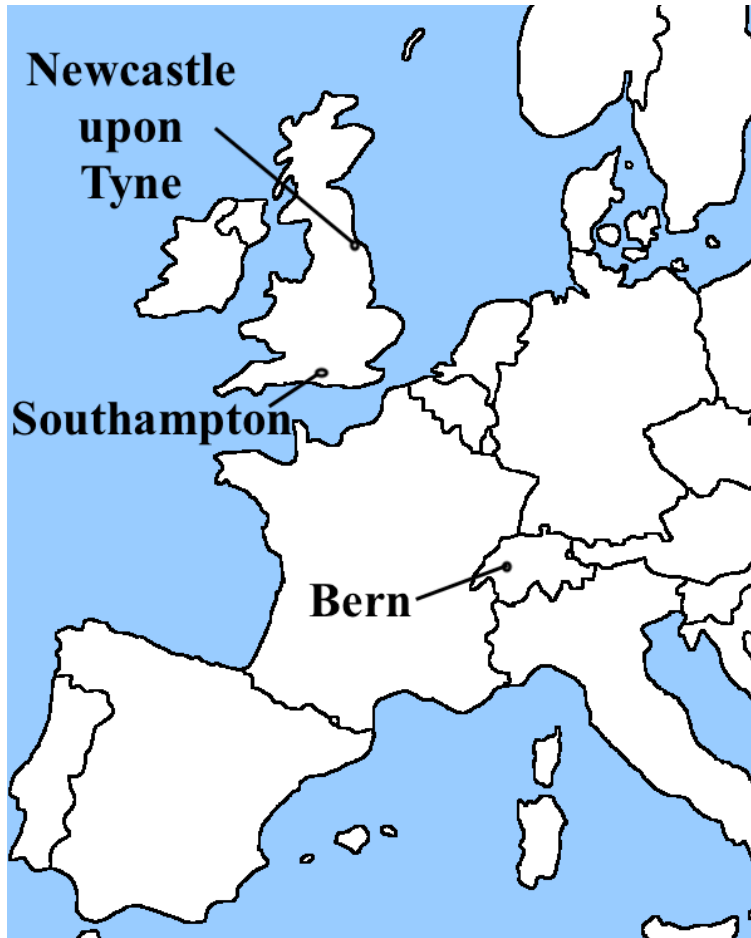

565  
566

*Appendix 1. Study centre locations.*

| Southampton + Newcastle 24-hour urine finding       | Total, n (%)<br>(total n=2521) | Stone Type, n (% of Biochemical Diagnosis) |                   |           |             | Recurrence, n/total n<br>(total with data on Recurrence, n=391) |
|-----------------------------------------------------|--------------------------------|--------------------------------------------|-------------------|-----------|-------------|-----------------------------------------------------------------|
|                                                     |                                | Calcium Oxalate                            | Calcium Phosphate | Urate     | Unknown     |                                                                 |
| No abnormality                                      | 520 (20.6%)                    | 256 (49.2%)                                | 29 (5.6%)         | 7 (1.3%)  | 227 (43.7%) | 40/95                                                           |
| Low Urine Volume                                    | 344 (13.6%)                    | 166 (48.3%)                                | 11 (3.2%)         | 3 (0.9%)  | 164 (47.7%) | 21/53                                                           |
| Hypercalciuria                                      | 333 (13.2%)                    | 169 (50.8%)                                | 7 (2.1%)          | 3 (0.9%)  | 154 (46.2%) | 19/39                                                           |
| Hyperoxaluria                                       | 172 (6.8%)                     | 84 (48.8%)                                 | 4 (2.3%)          | 1 (0.6%)  | 81 (47.1%)  | 6/22                                                            |
| Acid urine                                          | 167 (6.6%)                     | 72 (43.1%)                                 | 2 (1.2%)          | 9 (5.4%)  | 84 (50.3%)  | 11/32                                                           |
| Hypercalciuria + Hyperoxaluria                      | 134 (5.3%)                     | 66 (49.3%)                                 | 5 (3.7%)          | 0         | 63 (47.0%)  | 6/17                                                            |
| Hypercalciuria + Low Urine Volume                   | 128 (5.1%)                     | 70 (54.7%)                                 | 2 (1.6%)          | 1 (0.8%)  | 55 (43.0%)  | 9/20                                                            |
| Acid urine + Low Urine Volume                       | 121 (4.8%)                     | 51 (42.1%)                                 | 0                 | 11 (9.1%) | 59 (48.8%)  | 6/16                                                            |
| Hypercalciuria + Acid Urine                         | 81 (3.2%)                      | 35 (43.2%)                                 | 2 (2.5%)          | 1 (1.2%)  | 43 (53.1%)  | 1/4                                                             |
| Hyperoxaluria + Low Urine Volume                    | 66 (2.6%)                      | 38 (57.6%)                                 | 1 (1.5%)          | 0         | 27 (40.9%)  | 2/5                                                             |
| Hyperoxaluria + Acid Urine                          | 47 (1.9%)                      | 25 (53.2%)                                 | 1 (2.1%)          | 1 (2.1%)  | 20 (42.6%)  | 0/0                                                             |
| Hyperuricosuria                                     | 46 (1.8%)                      | 25 (54.3%)                                 | 1 (2.2%)          | 2 (4.3%)  | 18 (39.1%)  | 3/10                                                            |
| Hypercalciuria + Hyperuricosuria                    | 46 (1.8%)                      | 32 (69.6%)                                 | 0                 | 0         | 14 (30.4%)  | 5/10                                                            |
| Hyperoxaluria + Acid Urine + Low Urine Volume       | 33 (1.3%)                      | 19 (57.6%)                                 | 0                 | 2 (6.1%)  | 12 (36.4%)  | 2/7                                                             |
| Hypercalciuria + Hyperoxaluria + Hyperuricosuria    | 30 (1.2%)                      | 12 (40.0%)                                 | 0                 | 1 (3.3%)  | 17 (56.7%)  | 4/9                                                             |
| Hypercalciuria + Hyperoxaluria + Acid Urine         | 29 (1.2%)                      | 15 (51.7%)                                 | 0                 | 1 (3.4%)  | 13 (44.8%)  | 4/5                                                             |
| Hypercalciuria + Hyperoxaluria + Low Urine Volume   | 27 (1.1%)                      | 17 (63.0%)                                 | 0                 | 0         | 9 (33.3%)   | 1/1                                                             |
| Hypercalciuria + Acid Urine + Low Urine Volume      | 25 (1.0%)                      | 13 (52.0%)                                 | 0                 | 0         | 12 (48.0%)  | 2/2                                                             |
| Hyperuricosuria + Low Urine Volume                  | 23 (0.9%)                      | 8 (34.8%)                                  | 1 (4.3%)          | 2 (8.7%)  | 11 (47.8%)  | 1/2                                                             |
| Hyperuricosuria + Acid Urine                        | 22 (0.9%)                      | 9 (40.9%)                                  | 0                 | 3 (13.6%) | 10 (45.5%)  | 4/7                                                             |
| Hyperoxaluria + Hyperuricosuria                     | 21 (0.8%)                      | 11 (52.4%)                                 | 0                 | 2 (9.5%)  | 8 (38.1%)   | 4/9                                                             |
| Hypercalciuria + Hyperuricosuria + Low Urine Volume | 19 (0.8%)                      | 8 (42.1%)                                  | 0                 | 0         | 11 (57.9%)  | 2/5                                                             |
| Hypercalciuria + Hyperuricosuria                    | 18 (0.7%)                      | 10 (55.6%)                                 | 0                 | 1 (5.6%)  | 7 (38.9%)   | 2/5                                                             |

|                                                                                  |           |            |           |           |           |     |
|----------------------------------------------------------------------------------|-----------|------------|-----------|-----------|-----------|-----|
| + Acid Urine                                                                     |           |            |           |           |           |     |
| Hyperuricosuria + Acid Urine + Low Urine Volume                                  | 13 (0.4%) | 6 (46.2%)  | 0         | 4 (30.8%) | 3 (23.1%) | 2/2 |
| Hypercalciuria + Hyperoxaluria + Hyperuricosuria + Acid Urine                    | 13 (0.4%) | 6 (46.2%)  | 0         | 3 (23.1%) | 4 (30.8%) | 6/8 |
| Hyperoxaluria + Hyperuricosuria + Low Urine Volume                               | 10 (0.3%) | 3 (30.0%)  | 1 (10.0%) | 0         | 6 (60.0%) | 1/1 |
| Hyperoxaluria + Hyperuricosuria + Acid Urine                                     | 8 (0.3%)  | 4 (50.0%)  | 0         | 0         | 4 (50.0%) | 0/1 |
| Hypercalciuria + Hyperoxaluria + Acid Urine + Low Urine Volume                   | 7 (0.2%)  | 3 (42.9%)  | 0         | 0         | 4 (57.1%) | 0/2 |
| Hypercalciuria + Hyperuricosuria + Acid Urine + Low Urine Volume                 | 7 (0.2%)  | 3 (42.9%)  | 0         | 1 (14.3%) | 3 (42.9%) | 2/2 |
| Hypercalciuria + Hyperoxaluria + Hyperuricosuria + Low Urine Volume              | 6 (0.2%)  | 4 (66.7%)  | 0         | 0         | 2 (33.3%) | 0/1 |
| Hyperoxaluria + Hyperuricosuria + Acid Urine + Low Urine Volume                  | 4 (0.1%)  | 3 (75.0%)  | 0         | 0         | 1 (25.0%) | 0/1 |
| Hypercalciuria + Hyperoxaluria + Hyperuricosuria + Acid Urine + Low Urine Volume | 1 (0.0%)  | 1 (100.0%) | 0         | 0         | 0         | 0/0 |

567

568

Appendix 2. Biochemistry diagnoses and recurrences for Newcastle/Southampton dataset.

569

| Bern<br>24-hour urine finding                                          | Total, n<br>(%<br>(total<br>n=609) | Stone Type, n (% of Biochemical Diagnosis) |                      |       |         | Recurrence,<br>n/total n (total<br>with data on<br>Recurrence,<br>n=609) |
|------------------------------------------------------------------------|------------------------------------|--------------------------------------------|----------------------|-------|---------|--------------------------------------------------------------------------|
|                                                                        |                                    | Calcium Oxalate                            | Calcium<br>Phosphate | Urate | Unknown |                                                                          |
| No abnormality                                                         | 111<br>(18.2%)                     | 85                                         | 13                   | 3     | 3       | 97/111                                                                   |
| Low Urine Volume                                                       | 80<br>(13.1%)                      | 65                                         | 5                    | 3     | 4       | 66/80                                                                    |
| Hypercalciuria                                                         | 53<br>(8.7%)                       | 43                                         | 7                    | 0     | 2       | 46/53                                                                    |
| Hyperoxaluria                                                          | 78<br>(12.8%)                      | 50                                         | 13                   | 6     | 4       | 71/78                                                                    |
| Acid urine                                                             | 50<br>(8.2%)                       | 36                                         | 2                    | 6     | 4       | 41/50                                                                    |
| Hypercalciuria +<br>Hyperoxaluria                                      | 24<br>(3.9%)                       | 19                                         | 4                    | 0     | 1       | 23/24                                                                    |
| Hypercalciuria + Low<br>Urine Volume                                   | 12<br>(2.0%)                       | 11                                         | 0                    | 0     | 1       | 11/12                                                                    |
| Acid urine + Low Urine<br>Volume                                       | 31<br>(7.1%)                       | 24                                         | 0                    | 5     | 2       | 26/31                                                                    |
| Hypercalciuria + Acid<br>Urine                                         | 5 (0.8%)                           | 5                                          | 0                    | 0     | 0       | 4/5                                                                      |
| Hyperoxaluria + Low Urine<br>Volume                                    | 15<br>(2.5%)                       | 12                                         | 0                    | 1     | 2       | 11/15                                                                    |
| Hyperoxaluria + Acid<br>Urine                                          | 32<br>(5.3%)                       | 26                                         | 3                    | 1     | 2       | 25/32                                                                    |
| Hyperuricosuria                                                        | 8 (1.3%)                           | 6                                          | 1                    | 1     | 0       | 8/8                                                                      |
| Hypercalciuria +<br>Hyperuricosuria                                    | 15<br>(2.5%)                       | 12                                         | 2                    | 0     | 1       | 13/15                                                                    |
| Hyperoxaluria + Acid<br>Urine + Low Urine Volume                       | 11<br>(1.8%)                       | 8                                          | 0                    | 3     | 0       | 11/11                                                                    |
| Hypercalciuria +<br>Hyperoxaluria +<br>Hyperuricosuria                 | 15<br>(2.5%)                       | 11                                         | 2                    | 0     | 2       | 14/15                                                                    |
| Hypercalciuria +<br>Hyperoxaluria + Acid<br>Urine                      | 9 (1.5%)                           | 7                                          | 0                    | 1     | 1       | 8/9                                                                      |
| Hypercalciuria +<br>Hyperoxaluria + Low Urine<br>Volume                | 2 (0.3%)                           | 2                                          | 0                    | 0     | 0       | 2/2                                                                      |
| Hypercalciuria + Acid<br>Urine + Low Urine Volume                      | 6 (1.0%)                           | 5                                          | 0                    | 1     | 0       | 5/6                                                                      |
| Hyperuricosuria + Low<br>Urine Volume                                  | 4 (0.7%)                           | 4                                          | 0                    | 0     | 0       | 3/4                                                                      |
| Hyperuricosuria + Acid<br>Urine                                        | 7 (1.1%)                           | 5                                          | 2                    | 0     | 0       | 5/7                                                                      |
| Hyperoxaluria +<br>Hyperuricosuria                                     | 11<br>(1.8%)                       | 8                                          | 0                    | 0     | 1       | 10/11                                                                    |
| Hypercalciuria +<br>Hyperuricosuria + Low<br>Urine Volume              | 2 (0.3%)                           | 1                                          | 1                    | 0     | 0       | 2/2                                                                      |
| Hypercalciuria +<br>Hyperuricosuria + Acid<br>Urine                    | 7 (1.1%)                           | 5                                          | 2                    | 0     | 0       | 7/7                                                                      |
| Hyperuricosuria + Acid<br>Urine + Low Urine Volume                     | 2 (0.3%)                           | 2                                          | 0                    | 0     | 0       | 2/2                                                                      |
| Hypercalciuria +<br>Hyperoxaluria +<br>Hyperuricosuria + Acid<br>Urine | 5 (0.8%)                           | 4                                          | 1                    | 0     | 0       | 4/5                                                                      |
| Hyperoxaluria +<br>Hyperuricosuria + Low<br>Urine Volume               | 1 (0.2%)                           | 1 (100%)                                   | 0                    | 0     | 0       | 1/1                                                                      |

|                                                                                           |          |          |   |         |   |     |
|-------------------------------------------------------------------------------------------|----------|----------|---|---------|---|-----|
| Hyperoxaluria +<br>Hyperuricosuria + Acid<br>Urine                                        | 4 (0.7%) | 3 (75%)  | 0 | 1 (25%) | 0 | 4/4 |
| Hypercalciuria +<br>Hyperoxaluria + Acid<br>Urine + Low Urine Volume                      | 4 (0.7%) | 3 (75%)  | 0 | 1 (25%) | 0 | 4/4 |
| Hypercalciuria +<br>Hyperuricosuria + Acid<br>Urine + Low Urine Volume                    | 2 (0.3%) | 1 (50%)  | 0 | 1 (50%) | 0 | 1/2 |
| Hypercalciuria +<br>Hyperoxaluria +<br>Hyperuricosuria + Low<br>Urine Volume              | 1 (0.2%) | 1 (100%) | 0 | 0       | 0 | 1/1 |
| Hyperoxaluria +<br>Hyperuricosuria + Acid<br>Urine + Low Urine Volume                     | 1 (0.2%) | 1 (100%) | 0 | 0       | 0 | 1/1 |
| Hypercalciuria +<br>Hyperoxaluria +<br>Hyperuricosuria + Acid<br>Urine + Low Urine Volume | 1 (0.2%) | 1 (100%) | 0 | 0       | 0 | 1/1 |

570

571

*Appendix 3. Biochemistry diagnoses and recurrences for Bern database.*

572

573
